# Supplementary material
Source: PubMed Central journal article supplement (PMC5971142)
Supplement: NIHMS933200-supplement-SupplementA.pdf [file NIHMS933200-supplement-SupplementA.pdf]

**TABLE S1. SUMMARY STATISTICS**

| <b>GWAS</b>                                     | <b>Study</b>                                                                         | <b>N</b>                                |
|-------------------------------------------------|--------------------------------------------------------------------------------------|-----------------------------------------|
| 1. Age at Menarche                              | Perry et al., 2014                                                                   | 182,416                                 |
| 2. Alzheimer's                                  | Lambert et al., 2013                                                                 | 54,162                                  |
| 3. Anorexia                                     | Jostins et al., 2012                                                                 | 17,767                                  |
| 4. Anxiety Disorder (Any)                       | Otowa et al., 2016                                                                   | 17,310                                  |
| 5. Attention-Deficit/<br>Hyperactivity Disorder | Neale et al., 2010                                                                   | 2,064 trios/896<br>cases/2,455 controls |
| 6. Autism                                       | Cross-Disorder Group of the Psychiatric Genomics Consortium, 2013                    | 10,263                                  |
| 7. Bipolar Disorder                             | Psychiatric GWAS Consortium Bipolar Disorder Working Group, 2011                     | 16,731                                  |
| 8. Birth Height                                 | Van der Valk et al., 2015                                                            | 28,459                                  |
| 9. Birth Weight                                 | Horikoshi et al., 2013                                                               | 26,836                                  |
| 10. Body Mass Index                             | Locke et al., 2015                                                                   | 322,154                                 |
| 11. Child IQ                                    | Benyamin et al., 2014                                                                | 17,989                                  |
| 12. Cigarettes Per Day                          | Tobacco and Genetics Consortium, 2010                                                | 73,853                                  |
| 13. College Completion                          | Rietveld et al., 2013                                                                | 95,427                                  |
| 14. Coronary Artery Disease                     | Schunkert et al., 2011                                                               | 84,266                                  |
| 15. Crohn's                                     | Jostins et al., 2012                                                                 | 20,883                                  |
| 16. Depressive Symptoms                         | Okbay et al., 2016                                                                   | 161,460                                 |
| 17. Ever/Never Smoked                           | Tobacco and Genetics Consortium, 2010                                                | 74,035                                  |
| 18. Extraversion                                | van den Berg et al., 2016                                                            | 63,030                                  |
| 19. HDL                                         | Teslovich et al., 2010                                                               | 99,900                                  |
| 20. Height                                      | Wood et al., 2014                                                                    | 253,288                                 |
| 21. Infant Head Circ.                           | Taal et al., 2012                                                                    | 10,768                                  |
| 22. Intracranial Vol.                           | Hibar et al., 2015                                                                   | 11,373                                  |
| 23. LDL                                         | Teslovich et al., 2010                                                               | 95,454                                  |
| 24. Major Depressive Disorder                   | Major Depressive Disorder Working Group of the Psychiatric Genomics Consortium, 2013 | 18,759                                  |
| 25. Neuroticism                                 | Okbay et al., 2016                                                                   | 170,911                                 |
| 26. Rheumatoid Arthritis                        | Stahl et al., 2010                                                                   | 25,500                                  |
| 27. Schizophrenia                               | Schizophrenia Working Group of the Psychiatric Genomics Consortium, 2014             | 150,064                                 |
| 28. Total Cholesterol                           | Teslovich et al., 2010                                                               | 100,184                                 |
| 29. Triglycerides                               | Teslovich et al., 2010                                                               | 96,598                                  |
| 30. Type 2 Diabetes                             | Morris et al., 2012                                                                  | 69,033                                  |
| 31. Ulcerative Colitis                          | Stahl et al., 2010                                                                   | 27,432                                  |
| 32. Waist-to-Hip Ratio                          | Shungin et al., 2015                                                                 | 212,248                                 |
| 33. Years of Education                          | Rietveld et al., 2013                                                                | 95,427                                  |

*Note:* The first column lists the phenotype measured in the discovery sample, the second column cites the study related to the discovery sample, and the third reflects the sample size of each discovery sample.

**Table S2. Phenotypes, Measures and Sample Sizes in the Young Adult Sample**

| <b>Test Phenotypes</b>               | <b>Measures</b>                                                                                             | <b>Timepoints Assessed</b>                   | <b>EUR N</b> | <b>TOT N</b> |
|--------------------------------------|-------------------------------------------------------------------------------------------------------------|----------------------------------------------|--------------|--------------|
| Alcohol Use                          | SRE (Schuckit, Smith, & Tipp, 1997)                                                                         | all                                          | 2919         | 5315         |
|                                      | Typical/past 30 days                                                                                        | all                                          | 3165         | 6136         |
|                                      | DSM-5 (American Psychological Association, 2013)                                                            | all                                          | 3167         | 6039         |
| Antisocial behavior                  | SSAGA Conduct Disorder (Bucholz et al., 1994)                                                               | Y1F                                          | 3708         | 7461         |
| Anxiety                              | SCL-90 (Derogatis & Cleary, 1977)                                                                           | all (symptoms)                               | 3717         | ~7495        |
|                                      | Disorder screening items                                                                                    | Y1S (lifetime), Y2 (past year); all for PTSD | ~3000        | ~6000        |
| BMI                                  | Calculated from self-reported height & weight                                                               | Y1F/Y2/Y3                                    | 3721         | 7507         |
| Caffeine                             | From Kendler & Prescott, 1999                                                                               | all                                          | 3247         | 6511         |
| Depression                           | SCL-90 (Derogatis & Cleary, 1977)                                                                           | all (symptoms),                              | 3717         | ~7495        |
|                                      | Disorder screening items                                                                                    | Y1S (lifetime), Y2 (past year); all for PTSD | ~3000        | ~6000        |
| Eating Disorder                      | DSM-IV-TR (American Psychological Association, 2000)                                                        | assessed at 1 time point (2013 spring)       | ~1784        | ~3873        |
| Family History                       | Self-report of family history of alcohol, drugs, internalizing                                              | Y1F                                          | ~2612        | ~5141        |
| Grade Point Average (GPA)            | Official records                                                                                            | all                                          | 3743         | 7571         |
| Height                               | Self-report                                                                                                 | Y1F, Y2, Y3                                  | 3739         | 7544         |
| Insomnia                             | PSQI (Buysse, Reynolds, Monk, Berman & Kupfer, 1989)                                                        | Y3, cohort 1 only                            | 450          | 930          |
| Mindfulness                          | MAAS (Brown & Ryan, 2003)                                                                                   | Y2, cohort 1 only                            | 541          | 1178         |
| Parental Education                   | Self-report of highest known parental education level                                                       | Y1F                                          | 3722         | 7383         |
| Parenting                            | Steinberg Parenting Scale (Steinberg, Lamborn, Dornbusch, & Darling, 1992)                                  | Y1F                                          | 1034         | 2003         |
| Peer Deviance                        | From Kendler, Jacobso, Myers, & Eaves, 2008                                                                 | Y1F (high school), Y1S, Y2, Y3               | ~3714        | ~7455        |
| Personality – Big Five + Impulsivity | BFI (John & Srivastava), UPPS (Lynam, Smith, Whiteside, & Cyders, 2006)                                     | Y1F                                          | ~3000        | ~7500        |
| Physical Activity                    | IPAQ (Craig et al., 2003)                                                                                   | Y3, cohort 1 only                            | 433          | 896          |
| Relationships                        | RAS (Hendrick, 1988)                                                                                        | Y1S, Y2, Y3                                  | ~2645        | ~5447        |
| Religiosity                          | Personal Devotion (Kendler, Gardner & Prescott 1997)                                                        | Y1F                                          | ~3689        | ~7389        |
| Resilience                           | CD-RISC (Connor & Davidson, 2003)                                                                           | Y1F                                          | 3726         | 7505         |
| Sexual Behavior                      | CDC YRBS (Brener et al., 2004)                                                                              | Y3, cohort 1 only                            | ~449         | ~930         |
| Sexual Orientation                   | Self-reported                                                                                               | Y1F/Y2S/Y3S                                  | 1238         | 2637         |
| Smoking                              | FTND (Heatherton, Kozlowski, Frecker & Fagerstrom, 1991), self-report of initiation & frequency             | all                                          | ~3733        | 7527         |
| Social activity                      | Self-report involvement with sports & school activities                                                     | Y1S, Y2, Y3                                  | 2447         | 5117         |
| Social support                       | From Hays, Sherbourne & Mazel, 1995                                                                         | all                                          | 3694         | 7420         |
| Stressful Life Events & Trauma       | SLE (Kendler, Karkowski & Prescott, 1999); Life Events Checklist (trauma) (Gray, Litz, Hsu, Lombardo, 2004) | all                                          | ~3732        | ~7526        |
| Weight                               | Self-report                                                                                                 | Y1F/Y2/Y3                                    | 3727         | 7526         |
| Work Status                          | Self-report                                                                                                 | Y1F/Y1S/Y2S/Y3S                              | 3299         | 6572         |

*Note:* The first column reflects the phenotype being measured in the Virginia Student Survey, the second column cites the measure/reference used, the third column denotes the cohort(s) measured (Y=Year, F/S = Fall/Spring semesters), and the remaining two columns reflect the n sizes for each of the phenotyped samples. EUR N = number of European ancestry samples, TOT N = Total number of samples.

**Figure S1. African/African American (AFR) sample GPS on phenome regression q-value heatmap at GPS with prior proportion of causal effects = 0.3.**

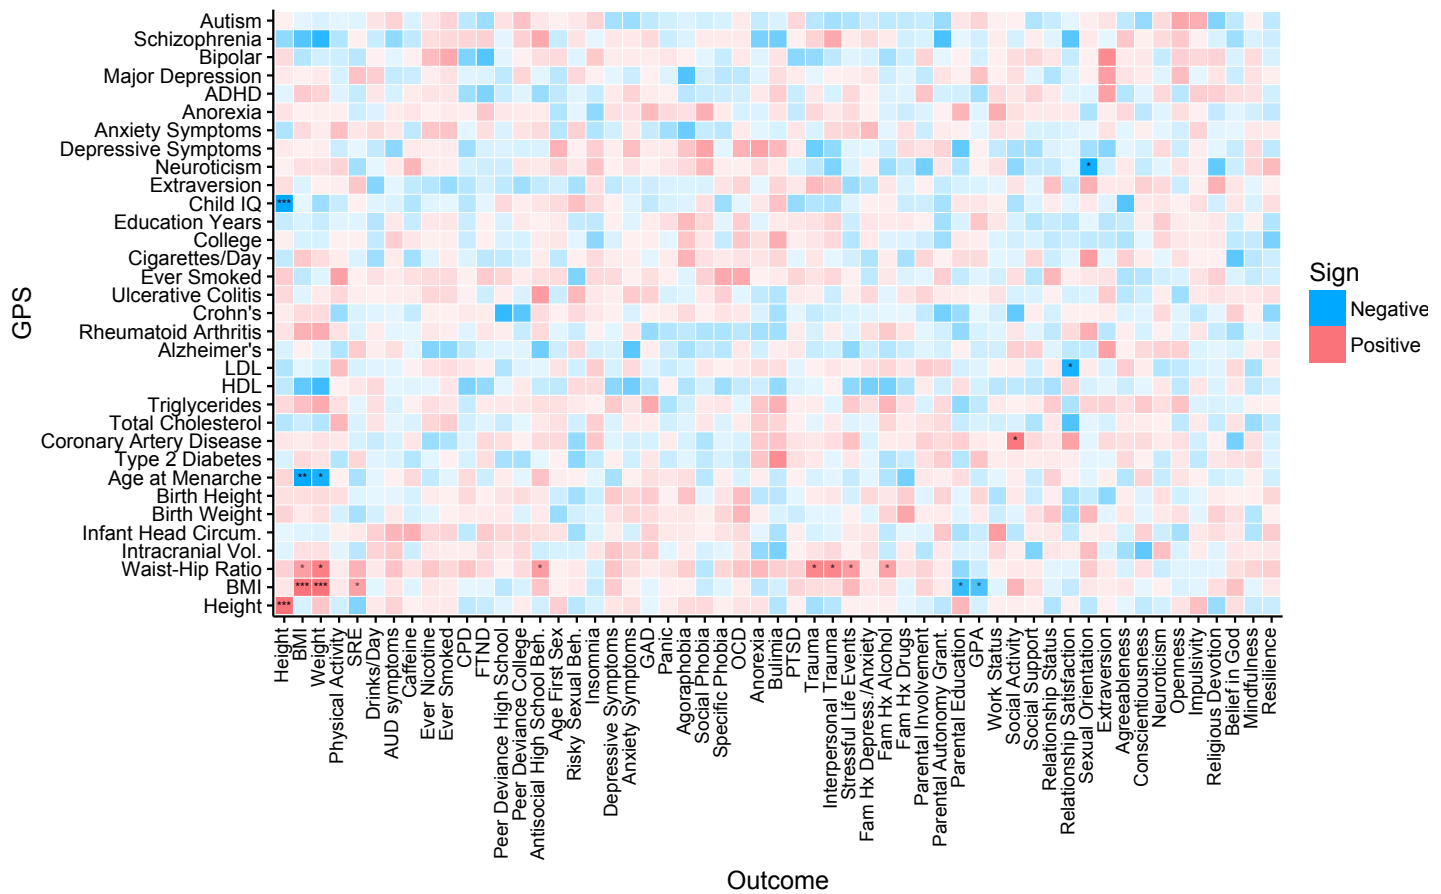

*Note.* Here, asterisks in the cells of the heatmap denote results of greater effect: \*\*\* = q-value < .01, \*\* = q-value < .05, \* = q-value < .16. Blue values reflect a negative association, and red reflect positive association. Intensity of color indicates  $-\log_{10}$  p-value.

**Figure S2. Admixed American (AMR) sample GPS on phenome regression q-value heatmap at GPS with prior proportion of causal effects = 0.3.**

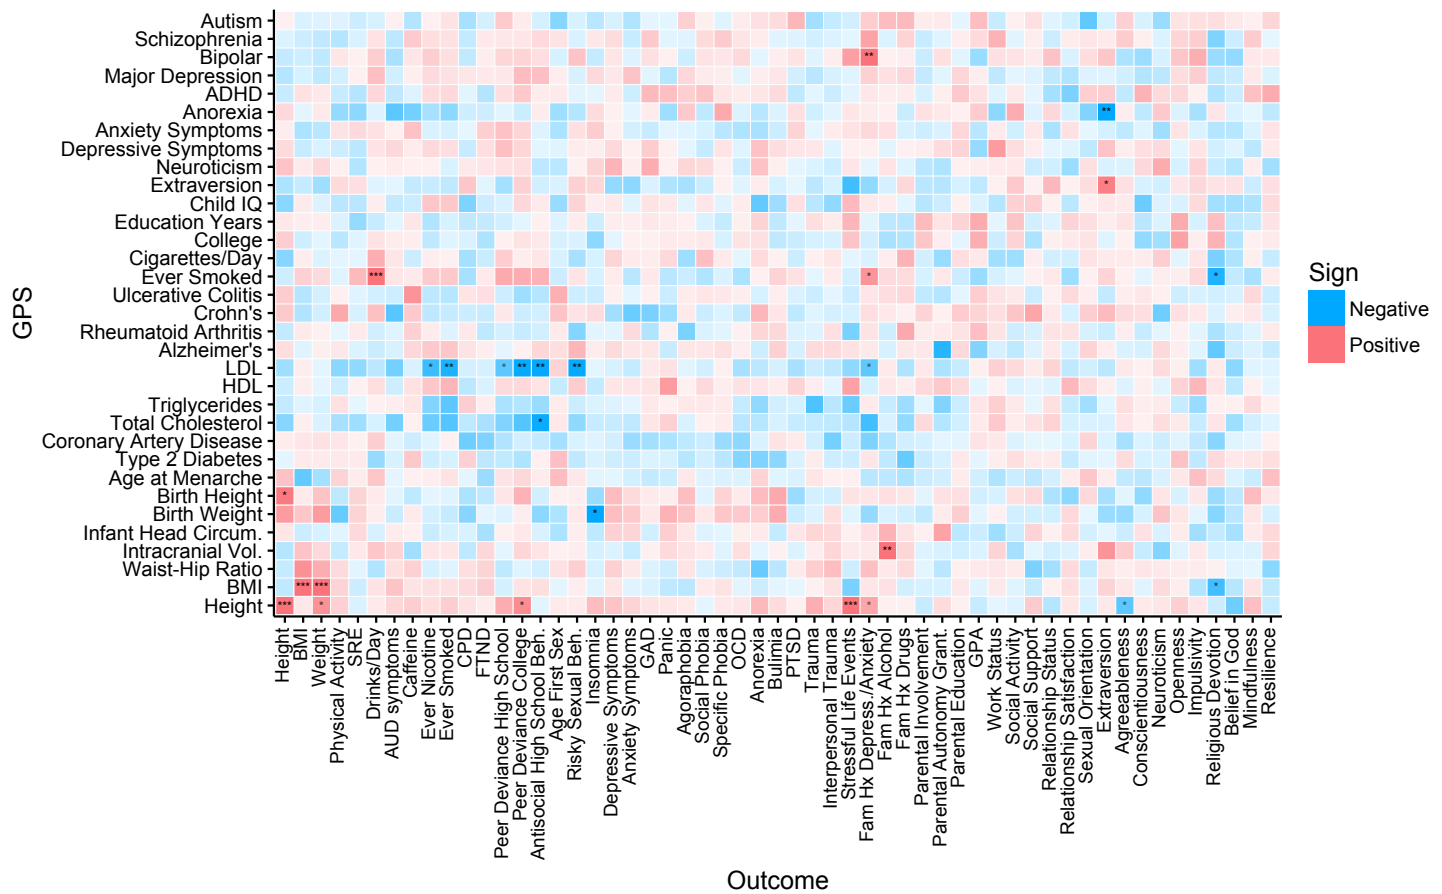

*Note.* Here, asterisks in the cells of the heatmap denote results of greater effect: \*\*\* = q-value < .01, \*\* = q-value < .05, \* = q-value < .16. Blue values reflect a negative association, and red reflect positive association. Intensity of color indicates  $-\log_{10}$  p-value.

**Figure S3. East Asian/East Asian American (EAS) sample GPS on phenome regression q-value heatmap at GPS with prior proportion of causal effects = 0.3.**

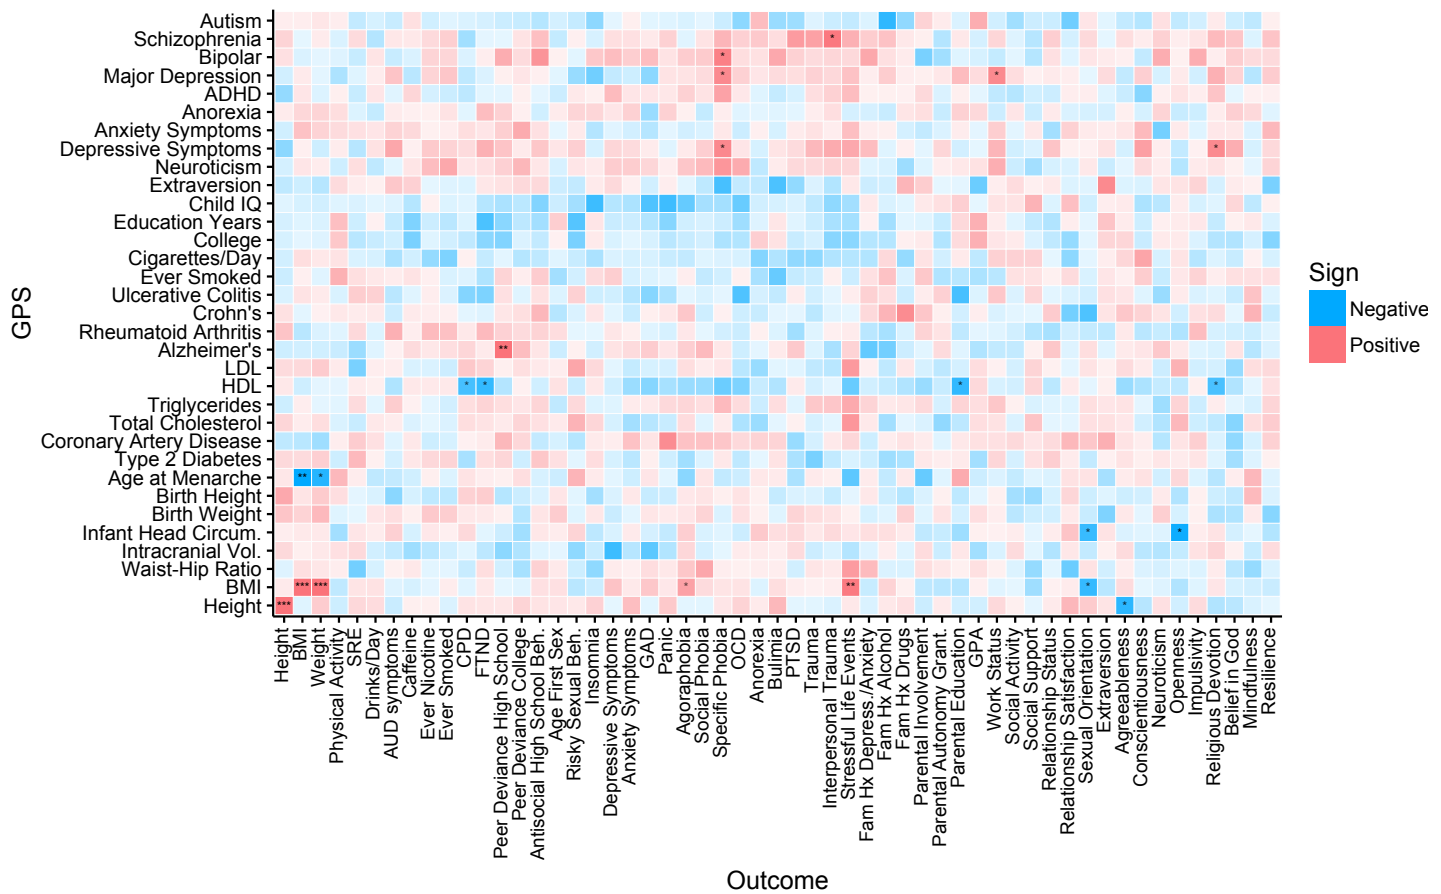

*Note.* Here, asterisks in the cells of the heatmap denote results of greater effect: \*\*\* = q-value < .01, \*\* = q-value < .05, \* = q-value < .16. Blue values reflect a negative association, and red reflect positive association. Intensity of color indicates  $-\log_{10}$  p-value.

**Figure S4. South Asian/South Asian American (SAS) sample GPS on phenome regression q-value heatmap at GPS with prior proportion of causal effects = 0.3.**

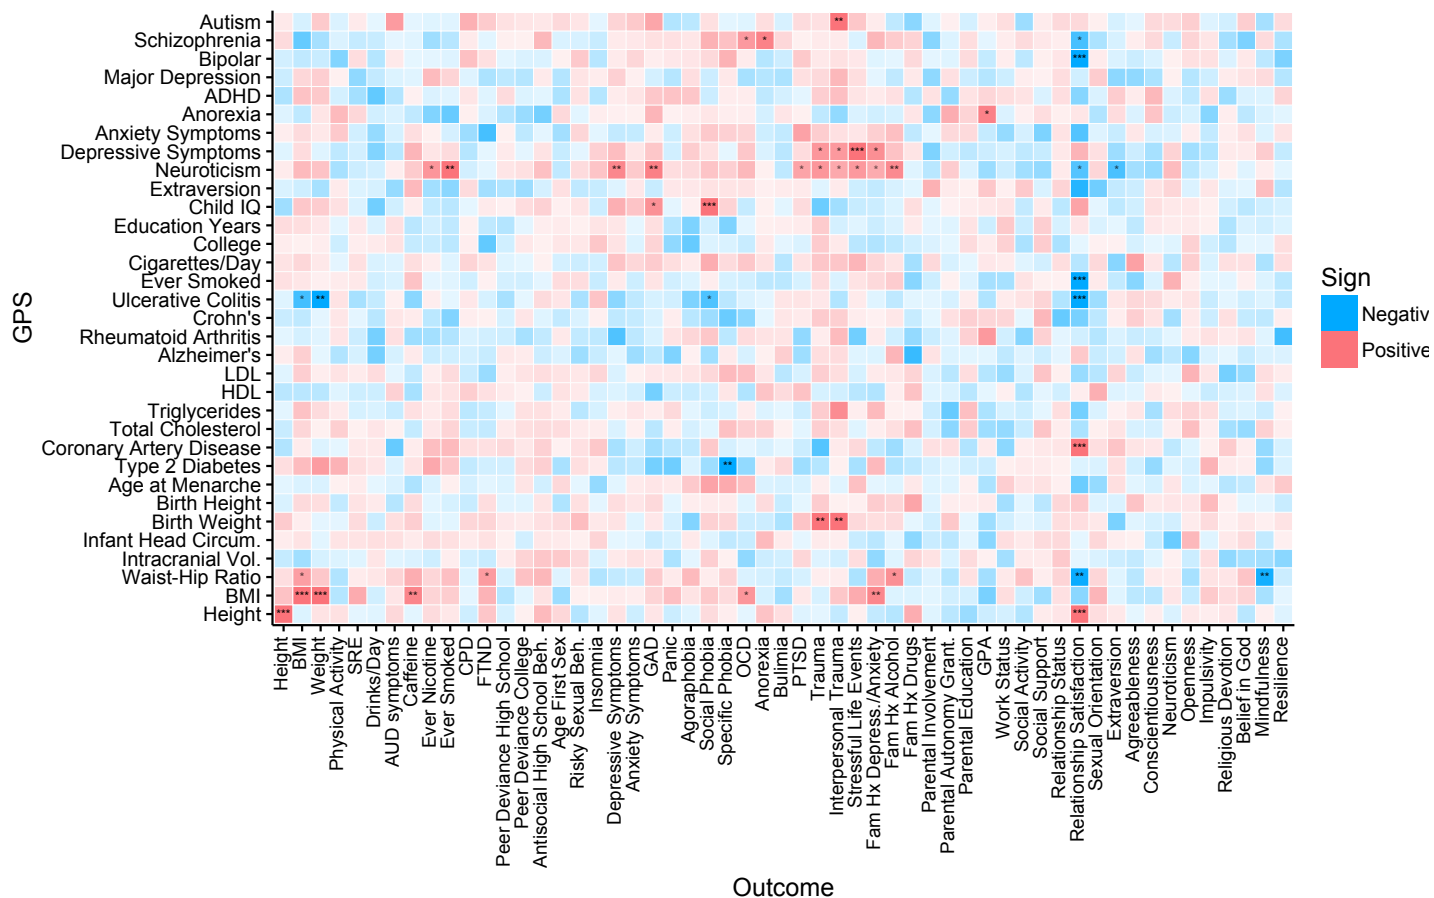

*Note.* Here, asterisks in the cells of the heatmap denote results of greater effect: \*\*\* = q-value < .01, \*\* = q-value < .05, \* = q-value < .16. Blue values reflect a negative association, and red reflect positive association. Intensity of color indicates  $-\log_{10}$  p-value.

**Figure S5. Genetic Overlap and Co-Heritability of GPS in African/African American (AFR) sample.**

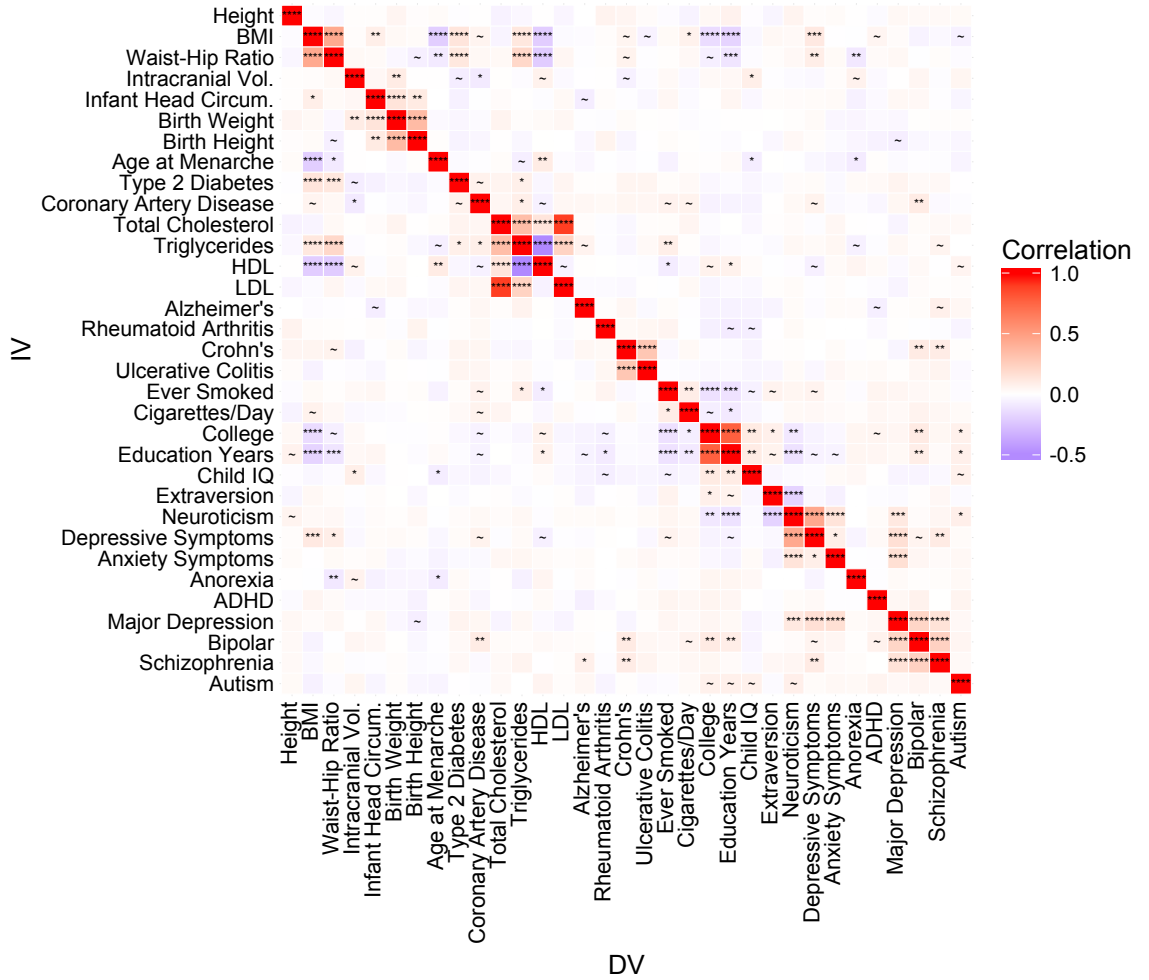

Note. Heatmap of partial correlation coefficients between GPS with prior proportion of causal effects = 0.3. Here, asterisks in the cells of the heatmap denote results of greater effect: \*\*\*\* = q-value < 0.0001, \*\*\* = q-value < 0.001, \*\* = q-value < 0.01, \* = q-value < 0.05, and ~ = suggestive significance at q-value < 0.16. Blue values reflect a negative correlation, and red reflect positive correlation.

**Figure S6. Genetic Overlap and Co-Heritability of GPS in Admixed American (AMR) sample.**

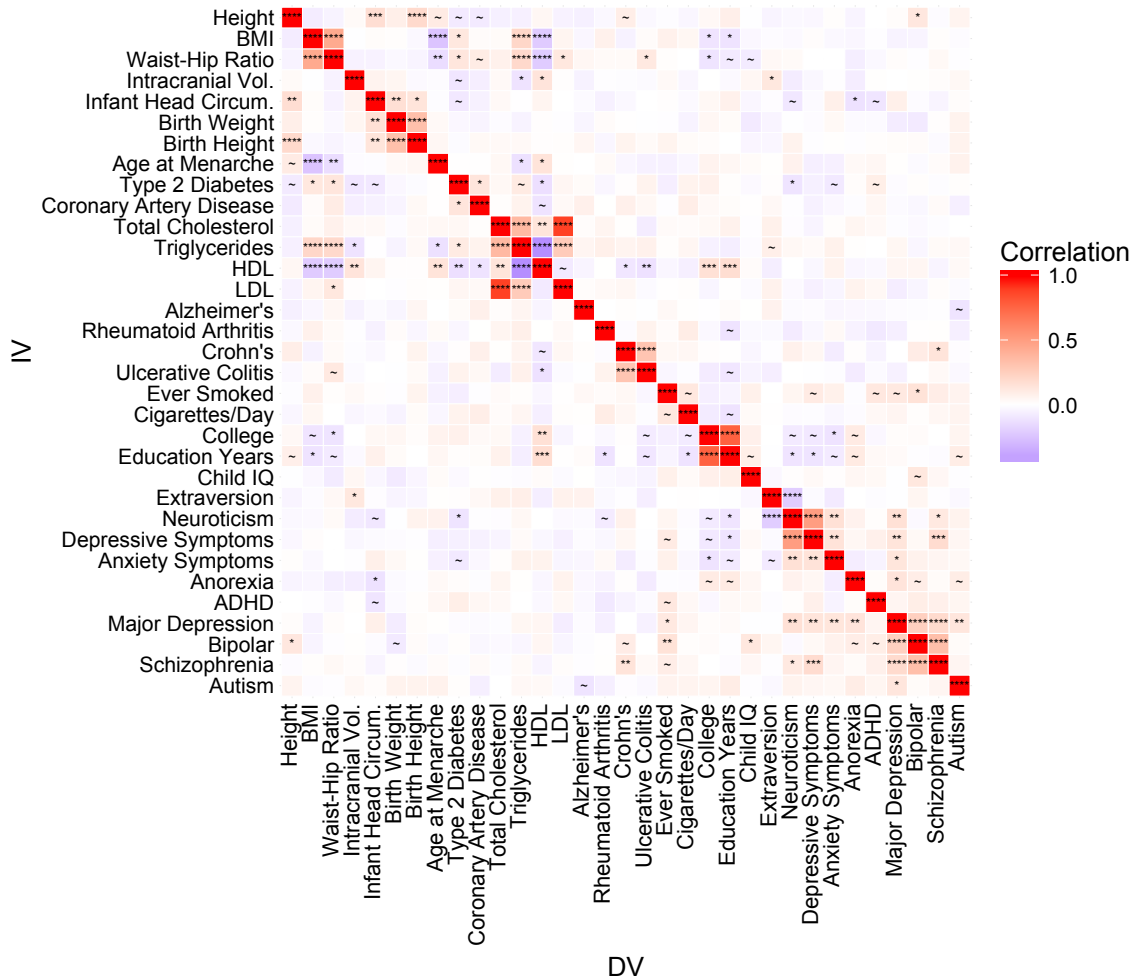

*Note.* Heatmap of partial correlation coefficients between GPS with prior proportion of causal effects = 0.3. Here, asterisks in the cells of the heatmap denote results of greater effect: \*\*\*\* = q-value < 0.0001, \*\*\* = q-value < 0.001, \*\* = q-value < 0.01, \* = q-value < 0.05, and ~ = suggestive significance at q-value < 0.16. Blue values reflect a negative correlation, and red reflect positive correlation.



**Figure S7. Genetic Overlap and Co-Heritability of GPS in East Asian/East Asian American (EAS) sample.**

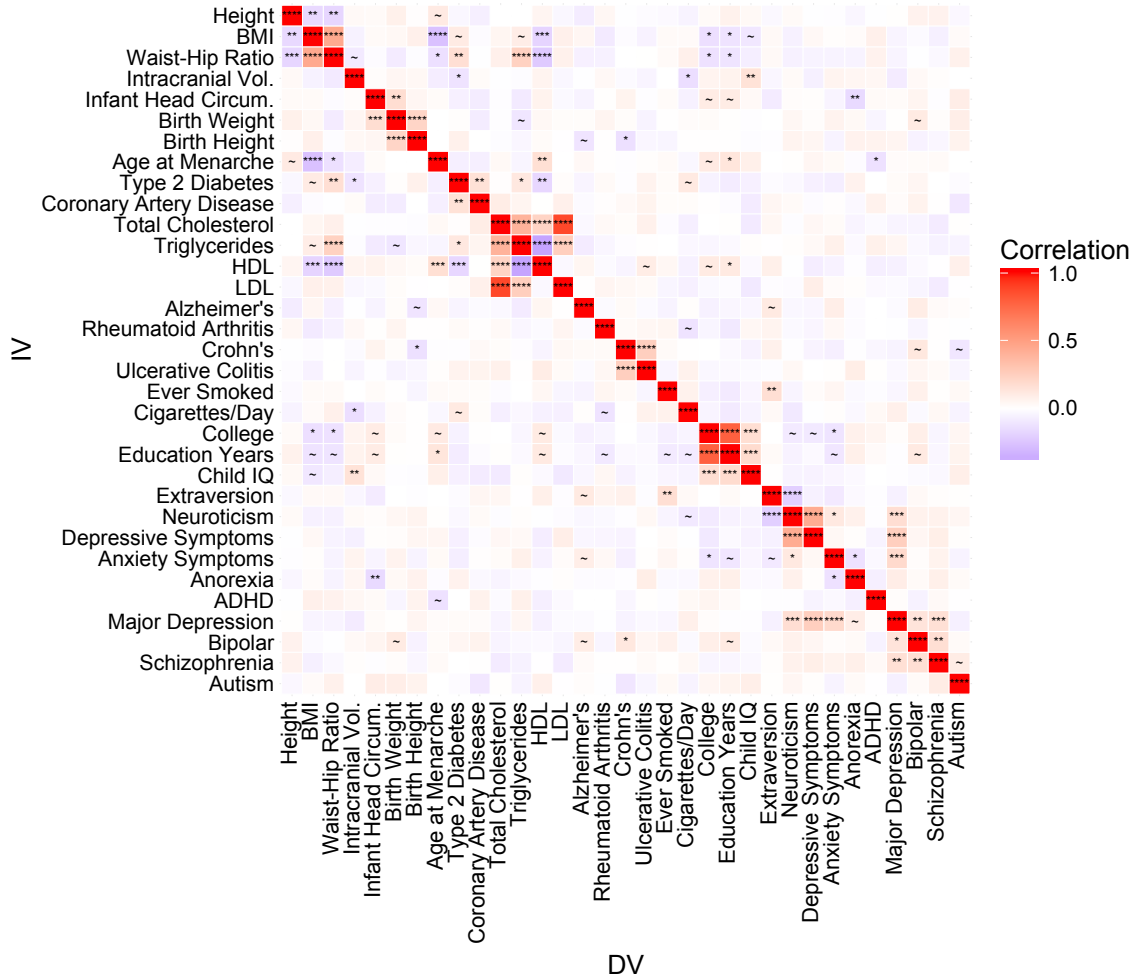

Note. Heatmap of partial correlation coefficients between GPS with prior proportion of causal effects = 0.3. Here, asterisks in the cells of the heatmap denote results of greater effect: \*\*\*\* = q-value < 0.0001, \*\*\* = q-value < 0.001, \*\* = q-value < 0.01, \* = q-value < 0.05, and ~ = suggestive significance at q-value < 0.16. Blue values reflect a negative correlation, and red reflect positive correlation.

**Figure S8. Genetic Overlap and Co-Heritability of GPS in South Asian/South Asian American (SAS) sample.**

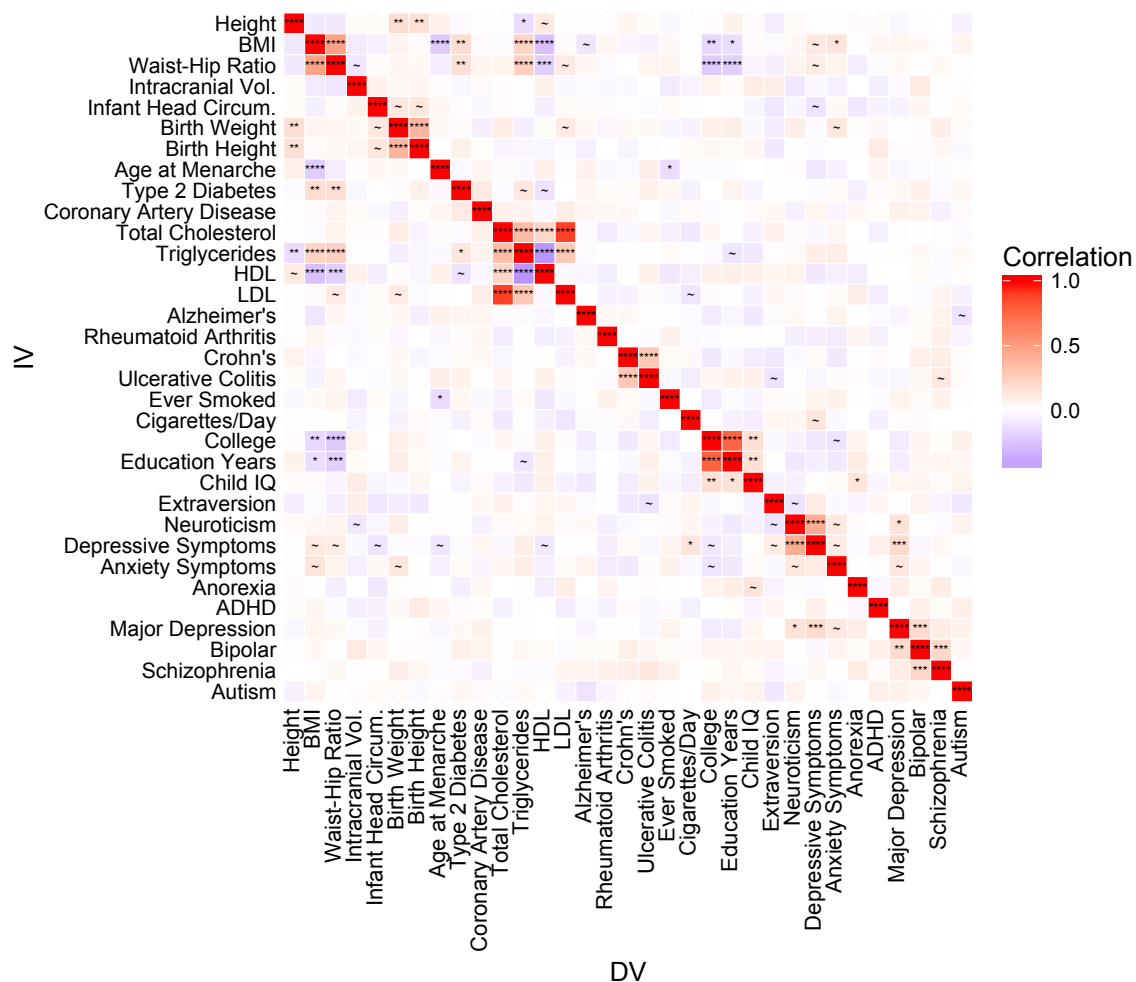

*Note.* Heatmap of partial correlation coefficients between GPS with prior proportion of causal effects = 0.3. Here, asterisks in the cells of the heatmap denote results of greater effect: \*\*\*\* =  $q$ -value < 0.0001, \*\*\* =  $q$ -value < 0.001, \*\* =  $q$ -value < 0.01, \* =  $q$ -value < 0.05, and ~ = suggestive significance at  $q$ -value < 0.16. Blue values reflect a negative correlation, and red reflect positive correlation.
